# Supplementary material for: Basement membrane collagen IV deficiency promotes abdominal aortic aneurysm formation
Source: PubMed Central journal article supplement (PMC8213747; doi:10.1038/s41598-021-92303-y), 2021-06-18
Supplement: 41598_2021_92303_MOESM1_ESM.pdf [file 41598_2021_92303_MOESM1_ESM.pdf]

# Supplementary Material

## Basement Membrane Collagen IV Deficiency Promotes Abdominal Aortic Aneurysm Formation.

Steffensen LB<sup>1,2,3</sup>, Stubbe J<sup>2</sup>, Lindholt JS<sup>1,4</sup>, Beck HC<sup>3</sup>, Overgaard M<sup>3</sup>, Bloksgaard M<sup>2</sup>, Genovese F<sup>5</sup>, Holm Nielsen S<sup>5,6</sup>, Tha MLT<sup>1</sup>, Bang-Moeller SK<sup>2</sup>, Hong Lin MKT<sup>1</sup>, Larsen JH<sup>1,2,3</sup>, Hansen DR<sup>1,2,3</sup>, Jones GT<sup>7</sup>, Bown MJ<sup>4,8</sup>, Karsdal MA<sup>5</sup>, Rasmussen LM<sup>1,3\*</sup>

### Author affiliations

1. Centre for Individualized Medicine in Artery Diseases, Odense University Hospital, Odense, Denmark
2. Department of Molecular Medicine, University of Southern Denmark, Odense, Denmark
3. Department of Clinical Biochemistry and Pharmacology, Odense University Hospital, Odense, Denmark
4. Department of Cardiothoracic and Vascular Surgery, Odense University Hospital, Odense, Denmark
5. Nordic Bioscience, Herlev, Denmark
6. Biomedicine and Biotechnology, Technical University of Denmark, Lyngby, Denmark
7. University of Otago, Dunedin, Otago, New Zealand
8. Department of Cardiovascular Sciences and the NIHR Leicester Biomedical Research Centre, University of Leicester, Leicester, United Kingdom

### Corresponding author

Lars Melholt Rasmussen  
Odense University Hospital  
J. B. Winsløvs Vej 4, DK-5000, Odense C, Denmark  
lars.melholt.rasmussen@rsyd.dk  
+45-21158116

**Running title:** Reduced Collagen IV Promotes AAA Formation.



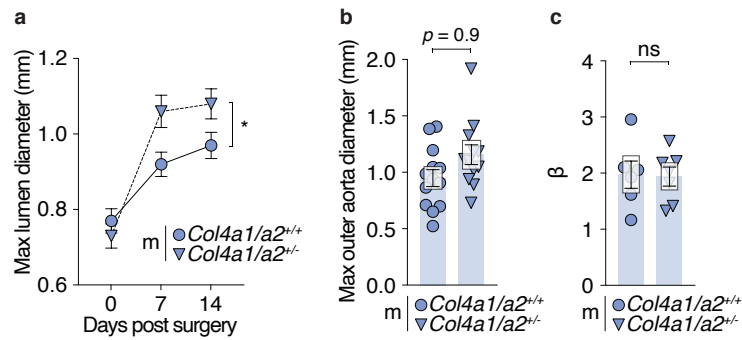

**Supplementary Figure 2** | **a.** Maximal lumen diameter measured by ultrasound in absolute values (as an alternative representation of data shown in Figure 2c). **b.** Maximal outer aorta diameter measured directly using images exemplified in Figure 2d (as an alternative representation of data shown in Figure 2e). **c.**  $\beta$ -value derived from exponential fitting of the stress-strain relationship in Figure 2h. The  $\beta$ -value is proportional to the intrinsic wall stiffness. Data are presented as mean  $\pm$  SEM. \*:  $p \leq 0.05$ , ns = non-significant. Two-way ANOVA was used in a. Unpaired t-test was used in b-c.  $n$  per group (PPE experiment) = 14-15.  $n$  per group (wire myography experiment) = 6-9. m = male.

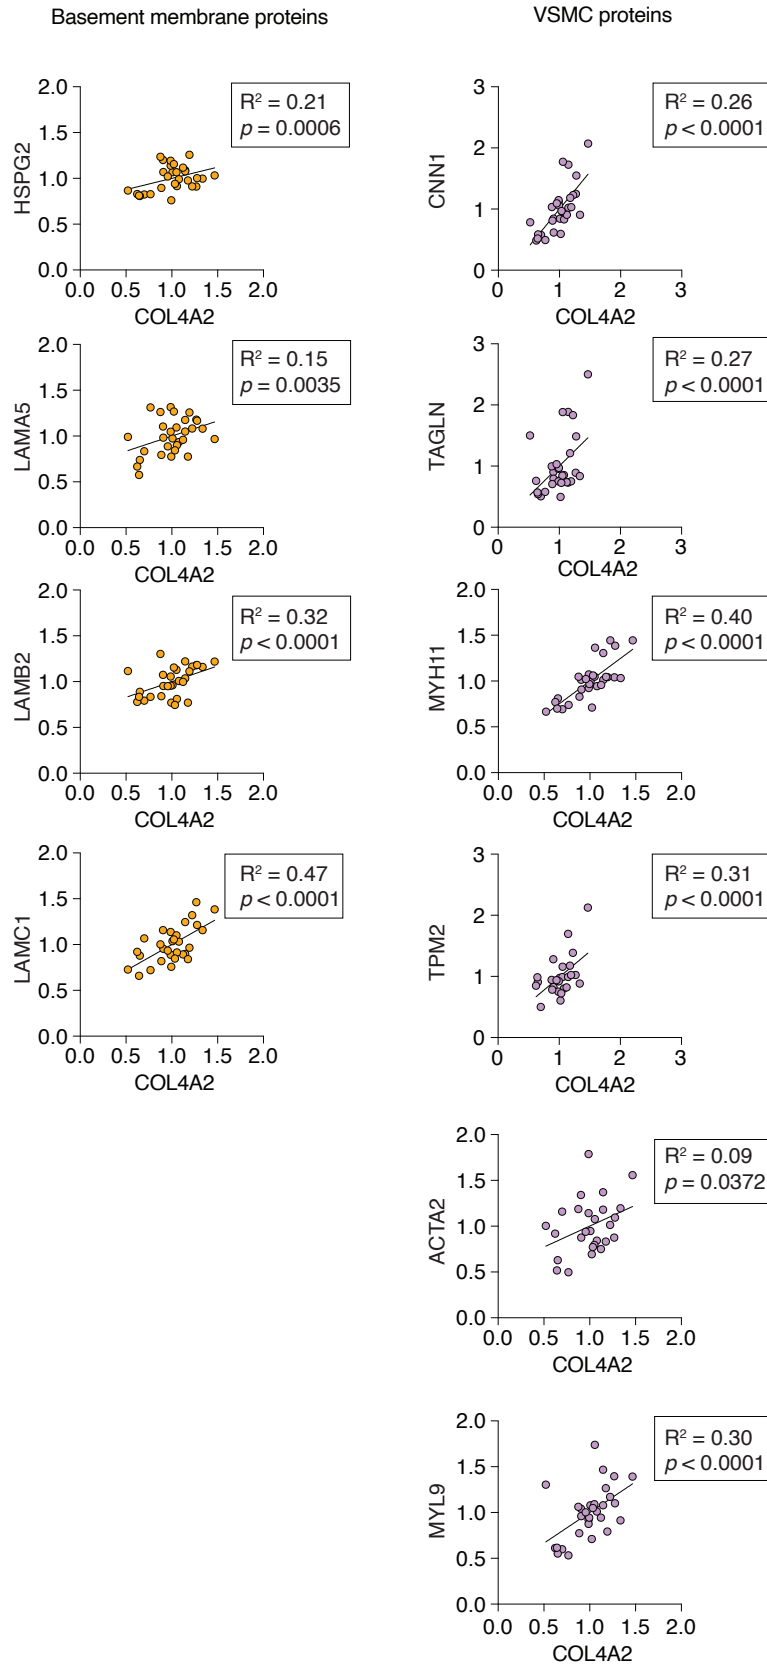

**Supplementary Figure 3** | Graphical representation of correlations shown in Table 1. Only correlations between COL4A2 (and not COL4A1) and the panel of proteins are shown for simplicity.

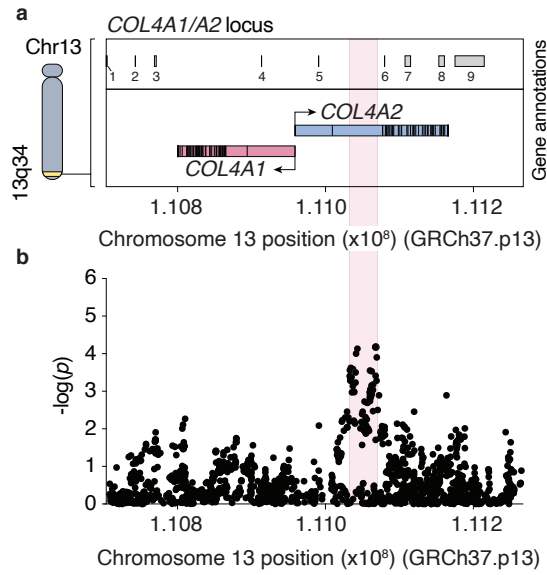

**Supplementary Figure 4 | a.** The *COL4A1/A2* locus (defined here as the *COL4A1/A2* genes (357 kb) flanked by 100 kb border regions) in chromosomal band 13q34. Besides the *COL4A1/A2* genes, the locus harbors nine genes/pseudogenes (shown in grey): 1. *RP11-403A3-3*, 2. *RN7SL783P*, 3. *RP11-472K17.3*, 4. *RP11-212E4.1*, 5. *MIR8073*, 6. *RP11-291I6.2*, 7. *COL4A2-AS2*, 8. *COL4A2-AS1*, 9. *RAB20*. Exons of *COL4A1/A2* are shown as vertical black lines. **b.** LocusZoom plot of AAA GWAS metadata showing associations between SNPs and AAA in the *COL4A1/A2* locus.

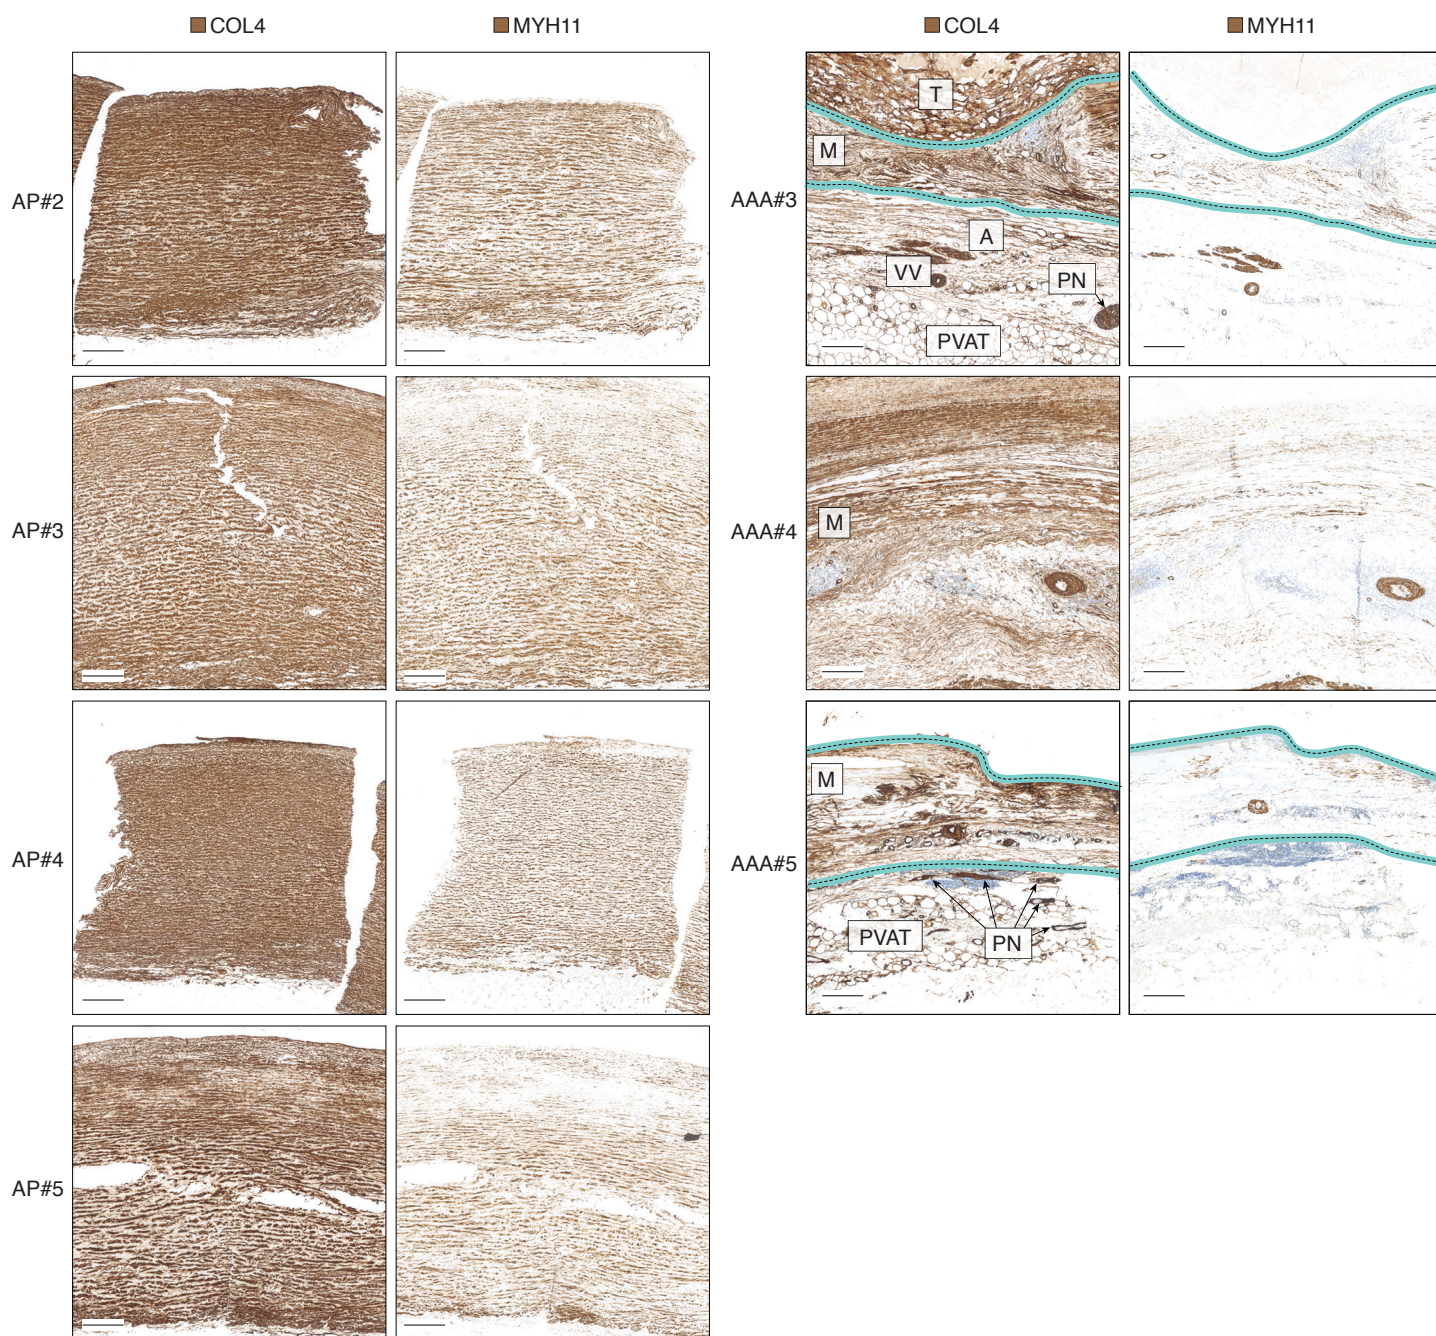

**Supplementary Figure 5** | COL4 and MYH11 immunohistochemical staining of four non-lesioned aortas and three of AAA lesions complementing stainings shown in Figure 4. To assist assessment of AAA lesions, the partially degraded medial (M) and adventitial (A) layers are labeled on overview images of COL4 stainings, and the media borders are marked with cyan/dotted lines. In addition, if visible, the mural thrombus (T), vaso vasorum (VV), peripheral nerves (PN), and perivascular adipose tissue (PVAT) are labeled. Scalebars = 1 mm. #2-#5 refer to sample IDs.

**SUPPLEMENTARY TABLES**

**Supplementary Table 1 |** Dichotomous and continuous variables between AAA patients and controls and their associations with plasma C4M and PRO-C4 levels.

| Dichotomy variables                             | Control vs. AAA (%)        | p       | C4M (No vs. Yes)           | p       | PRO-C4 (No vs. Yes)            | p     |
|-------------------------------------------------|----------------------------|---------|----------------------------|---------|--------------------------------|-------|
| Familiar disposition                            | 3.1<br>7.1                 | 0.037   | 14.3 (8.1)<br>16.2 (8.51)  | 0.246   | 150.3 (99.7)<br>182.8 (213.1)  | 0.337 |
| Current smoking                                 | 17.6<br>40.4               | ≤ 0.001 | 13.7 (0.74)<br>13.4 (0.68) | ≤ 0.001 | 144.9 (103.9)<br>166.1 (118.4) | 0.021 |
| Diabetes Mellitus                               | 14.9<br>11.2               | 0.225   | 14.7 (8.54)<br>13.4 (6.50) | 0.102   | 154.1 (112.6)<br>137.4 (83.3)  | 0.102 |
| Hypertension                                    | 46.3<br>53.4               | 0.069   | 14.1 (9.19)<br>14.9 (7.40) | 0.204   | 143.0 (98.0)<br>160.9 (119.1)  | 0.031 |
| Previous stroke                                 | 1.0<br>3.7                 | 0.056   | 14.5 (8.37)<br>14.6 (5.97) | 0.963   | 52.3 (110.3)<br>145.7 (73.5)   | 0.701 |
| Previous AMI                                    | 1.5<br>6.3                 | 0.008   | 14.8 (8.37)<br>15.3 (7.0)  | 0.524   | 152.7 (111.2)<br>140.3 (63.8)  | 0.300 |
| Previous/current angina pectoris                | 5.4<br>10.0                | 0.055   | 14.6 (8.51)<br>13.4 (5.75) | 0.128   | 153.2 (112.6)<br>140.4 (66.0)  | 0.186 |
| Previous/current PAD                            | 0.5<br>1.2                 | 0.386   | 14.5 (8.32)<br>15.8 (7.47) | 0.666   | 151.7 (109.7)<br>190.1 (67.4)  | 0.184 |
| Previous ischemic event                         | 10.3<br>21.1               | 0.001   | 14.7 (8.75)<br>13.8 (5.82) | 0.194   | 154.3 (116.9)<br>141.8 (64.1)  | 0.099 |
| Use of bronchodilator                           | 7.9<br>10.7                | 0.198   | 14.5 (8.48)<br>14.3 (6.45) | 0.851   | 151.1 (112.1)<br>155.8 (79.1)  | 0.662 |
| Use of ACE-inhibitor                            | 22.2<br>27.3               | 0.138   | 14.2 (8.67)<br>15.4 (7.20) | 0.085   | 150.2 (118.0)<br>156.8 (82.9)  | 0.417 |
| Use of calcium-blocker                          | 17.2<br>23.6               | 0.075   | 14.5 (8.69)<br>14.5 (7.00) | 0.979   | 148.6 (103.3)<br>164.1 (132.0) | 0.187 |
| Use of beta-blocker                             | 22.7<br>29.5               | 0.057   | 14.6 (9.07)<br>14.1 (5.64) | 0.407   | 152.5 (120.4)<br>147.8 (71.0)  | 0.531 |
| Use of anti-blood platelets                     | 24.6<br>47.3               | ≤ 0.001 | 14.2 (7.36)<br>14.8 (9.53) | 0.393   | 151.4 (112.5)<br>152.4 (105.5) | 0.900 |
| Use of statins                                  | 36.5<br>52.5               | ≤ 0.001 | 14.4 (9.75)<br>14.2 (6.36) | 0.372   | 159.6 (132.9)<br>143.5 (76.3)  | 0.049 |
| Continuous variables                            | Mean (SD)                  | p       | C4M (Pearson's r)          | p       | PRO-C4 (Pearson's r)           | p     |
| Age (Years)                                     | 69.7 (2.9)<br>70.0 (2.8)   | 0.178   | -0.200                     | 0.559   | -0.015                         | 0.692 |
| Body mass index (kg/m <sup>2</sup> )            | 26.2 (3.4)<br>27.2 (3.6)   | ≤ 0.001 | 0.053                      | 0.168   | 0.028                          | 0.458 |
| Systolic blood pressure (mmHg)                  | 148 (19.4)<br>155 (21.4)   | ≤ 0.001 | 0.057                      | 0.136   | 0.039                          | 0.314 |
| Diastolic blood pressure (mmHg)                 | 81.0 (10.5)<br>88.1 (12.2) | ≤ 0.001 | 0.064                      | 0.095   | 0.045                          | 0.241 |
| Max. aortic diameter (mm)                       | 18.3 (2.8)<br>40.9 (11.9)  | ≤ 0.001 | 0.146                      | ≤ 0.001 | 0.079                          | 0.037 |
| AAA-growth rate                                 | -<br>3.06 (2.57)           | -       | 0.029                      | 0.585   | -0.006                         | 0.902 |
| ILT (intraluminal thrombus) (prop. of max area) | -<br>0.274 (0.315)         | -       | 0.051                      | 0.262   | 0.052                          | 0.251 |

Potential confounders associated with a  $p \leq 0.1$  for both AAA and a COL4A1/A2 fragments: Smoking, hypertension, previous ischemic event, use of statins, and diastolic blood pressure.

**Supplementary Table 2 |** Univariate and multiple Cox regression analyses of plasma C4M and PRO-C4 levels as independent risk factors of need for AAA repair and death (95% C.I. in parenthesis).

|        | Need for repair                     |                                     | Death                               |                                     |
|--------|-------------------------------------|-------------------------------------|-------------------------------------|-------------------------------------|
|        | HR                                  | Adjusted HR**                       | HR                                  | Adjusted HR*                        |
| C4M    | 1.009 (0.996; 1.022)<br>$p = 0.160$ | 1.001 (0.983; 1.020)<br>$p = 0.907$ | 1.020 (1.007; 1.032)<br>$p = 0.002$ | 1.018 (1.004; 1.032)<br>$p = 0.012$ |
| PRO-C4 | 1.000 (0.999; 1.001)<br>$p = 0.609$ | 1.000 (0.998; 1.001)<br>$p = 0.797$ | 1.002 (1.001; 1.002)<br>$p = 0.001$ | 1.001 (1.000; 1.002)<br>$p = 0.008$ |

\*Adjusted for smoking, hypertension, previous ischemic event, statins, and diastolic blood pressure.

\*\* : Adjusted as above and baseline maximal AAA diameter
